# Supplementary material
Source: PubMed Central journal article supplement (PMC2776106)
Supplement: emboj2009274s1.pdf [file emboj2009274s1.pdf]

## LEGENDS FOR SUPPLEMENTARY FIGURES

**Figure 1.** (A) Multiple sequence alignment of the N-terminal (residues 1-383) of MVP proteins. *Mus musculus* (Mm, accession number NP542369), *Homo sapiens* (Hs, accession number NP059447) *Xenopus laevis* (Xs, accession number NP001079939) *Danio rerio* (Dr, accession number NP958482) *Strongylocentrotus purpuratus* (Sp, accession number NP001116989). The strictly conserved residues are shown as red blocks and white characters and similar residues are shown in blue boxes and red characters. Secondary structure definitions, as determined in the crystal structure of R1-R7 are drawn above the sequence alignment. The predicted calcium binding regions of repeats R3 and R4 are marked by green bars below the sequence. (B) View of the  $\alpha$ -carbon trace in the R1-R7 structure with every tenth residues numbered. (C) Molecular surface of R1-R7 represented with the electrostatic potential, in blue and red for the positive and negative charges, respectively. The electrostatic potential was calculated and rendered with PyMOL (DeLano, 2002), with colouring levels ranging from  $-56.8$  to  $56.8$ . Two consecutive molecules in the P1 crystal packing are shown. A close-up of the electronegative surface of repeats R3 and R4 is depicted at the right side, with the acidic residues explicitly labeled. This surface would form the predicted binding site of  $\text{Ca}^{2+}$  ions and PTEN.

**Figure 2** Crystal packing of the vault particles in the C2 unit cell. (A) Packing is represented in the ac (left) and ab (right) planes. (B) Details of the intermolecular contacts, considering rings of different numbers of copies of the R1R7 fragment. No direct interactions are found when 38 copies are considered (left) and models with rotational symmetries of 40 or higher result in steric clashes (right). A rotational symmetry of 39 allows optimal interactions between neighbor vault particles.

**Figure 3** Thirty nine fold averaged density of the vault particle at 8 Å resolution. Side (a) and top (b) views of the electron density. Close-up pictures of the electron density around the R1-R7 (c) and the  $\alpha$ -helical domain regions (d), with the  $\text{C}\alpha$  models placed inside.

**Figure 4** Secondary structural elements of MVP identified in the 8 Å averaged density of the vault particle. These secondary structure features were identified and modeled

using the AIRS programs (Baker et al., 2007), which provides a graphic interface to the SSEHunter and SSEbuilder programs in the Chimera visualization software package (Pettersen et al., 2004) The vault particle is represented by cylinders ( $\alpha$ -helices, yellow) and planks ( $\beta$ -sheets, blue). Top (left) and side (right) views are shown.

**Figure 5** Density correlation plots corresponding to the R1R7 region (residues 1-380) in the structures of: (A) crystal form P1 of the R1R7 fragment, (B) the 3.5 Å of the entire vault particle (Tanaka et al., 2009).

**Figure 6** Stereoview of a simulated annealing Fo-Fc omit map (contoured at  $3.0 \sigma$ ) around the  $\beta 2$ -  $\beta 3$  loops of R1 and R2 domains of the R1-R7 structure (P1 crystal form)., The model is placed inside in ball and stick representation colored in atom type code. Names for the N- and C-terminal residues of each loop are labeled.

**Figure 7** View of the R1-R7 packing interactions, conserved in all three crystals forms. Asp39 of R1 appears protonated, interacting with the peptide oxygen of Gly354 of the neighbouring R7. In addition, residues Ile7 and Ile36 are involved in hydrophobic contacts with Leu358.

**Figure 8** Plot of the reciprocal space layer  $h=0$ , showing the severe anisotropy in the data. Intensity is represented by the size of the reflections. The figure was prepared with the program XPREP (BRUKER AXS).

**Figure 9.** Self-rotation function ( $180^\circ$  section), calculated from the 8 Å diffraction data of the of the  $P2_1$  vault crystals. The function was calculated with program MOLREP (CCP4, 1994).

## REFERENCES

- Baker, M.L., Ju, T. and Chiu, W. (2007) Identification of secondary structure elements in intermediate-resolution density maps. *Structure*, 15, 7-19.
- CCP4 (1994) The CCP4 suite: programs for protein crystallography. *Acta Crystallogr D Biol Crystallogr*, 50, 760-763.
- DeLano, W.L. The PyMOL Molecular Graphics System (DeLano Scientific, San Carlos, California, USA, 2002).
- Pettersen, E.F., Goddard, T.D., Huang, C.C., Couch, G.S., Greenblatt, D.M., Meng, E.C. and Ferrin, T.E. (2004) UCSF Chimera--a visualization system for exploratory research and analysis. *J Comput Chem*, 25, 1605-1612.

Tanaka, H., Kato, K., Yamashita, E., Sumizawa, T., Zhou, Y., Yao, M., Iwasaki, K., Yoshimura, M. and Tsukihara, T. (2009) The structure of rat liver vault at 3.5 angstrom resolution. *Science*, 323, 384-388

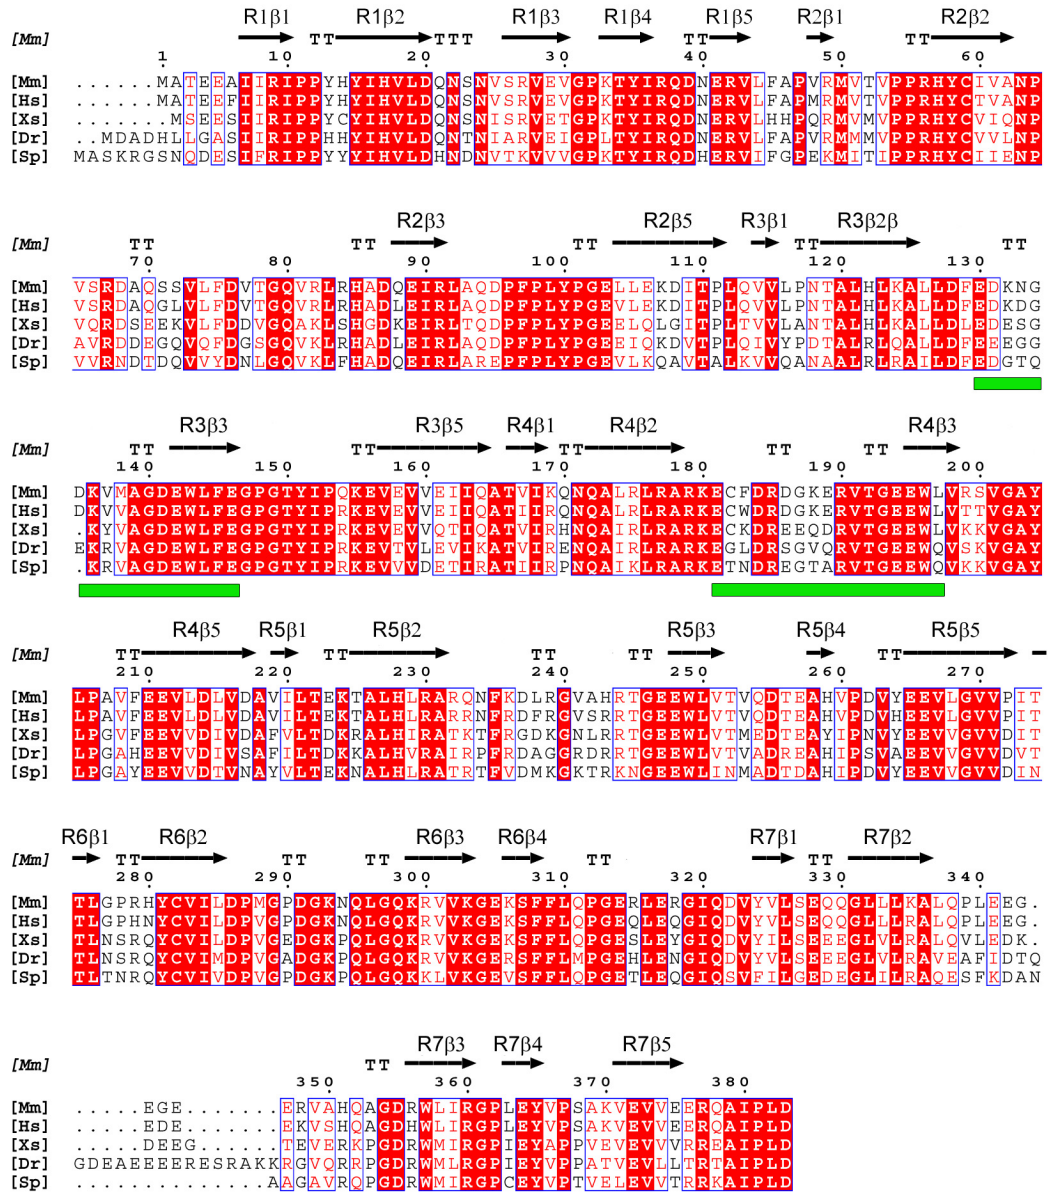

SI: Figure1A

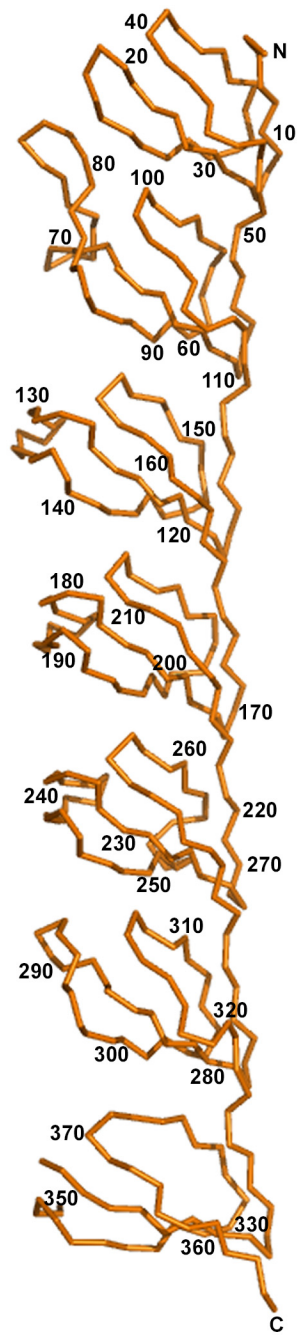

SI: Figure1B

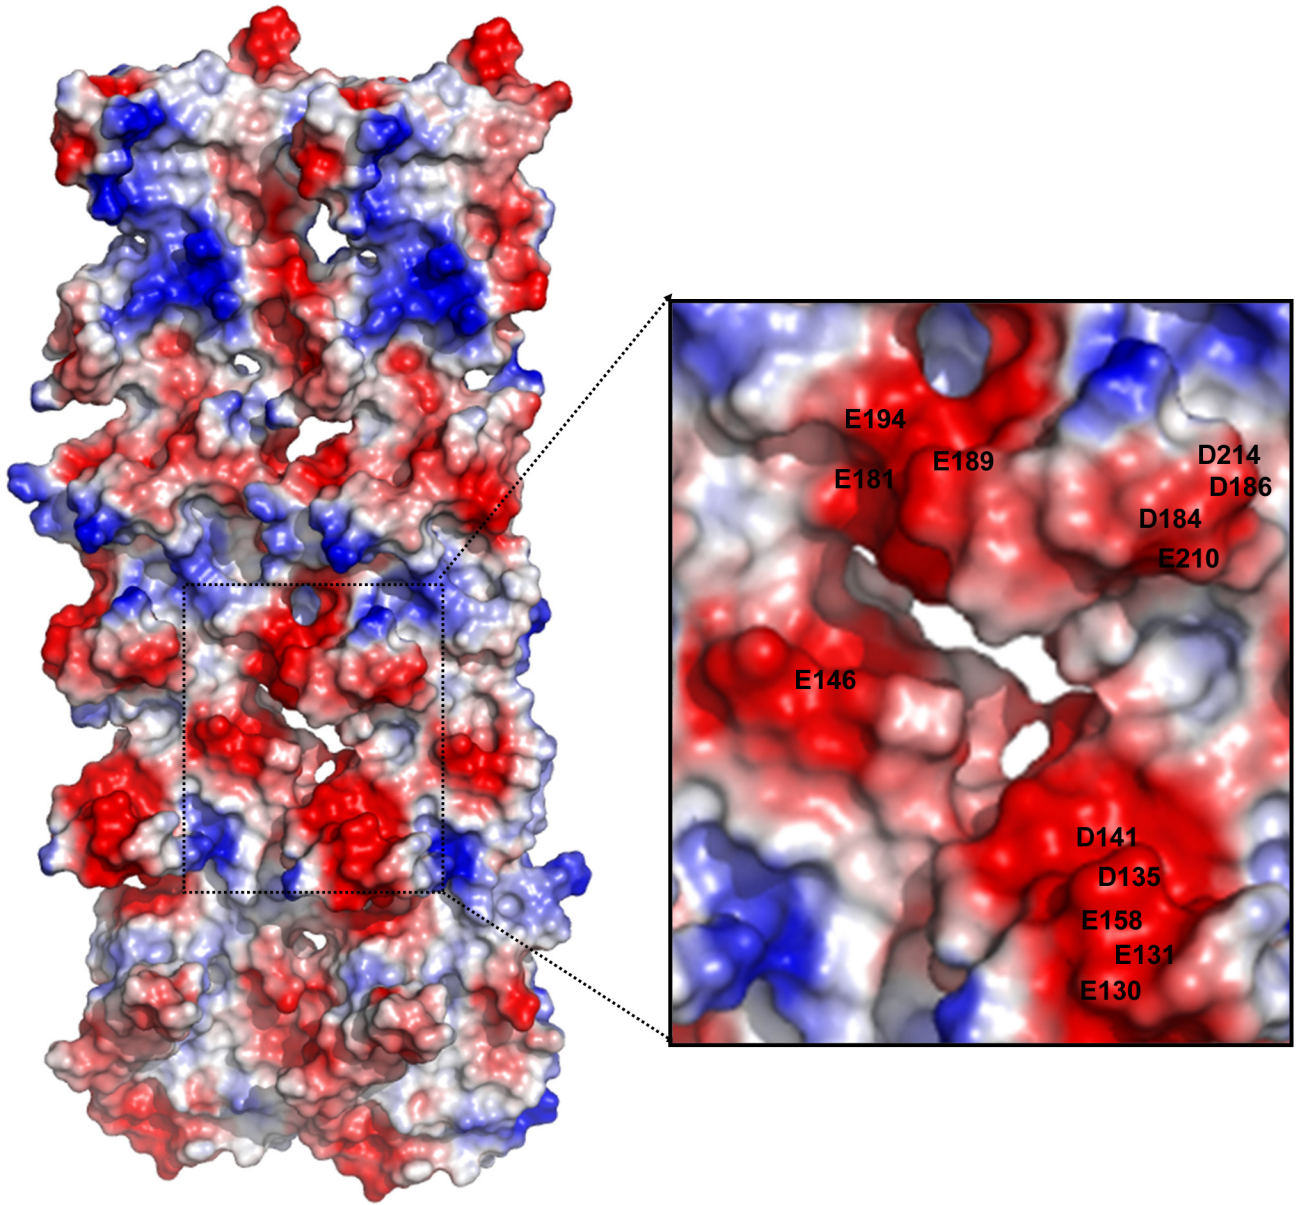

SI: Figure1C

A

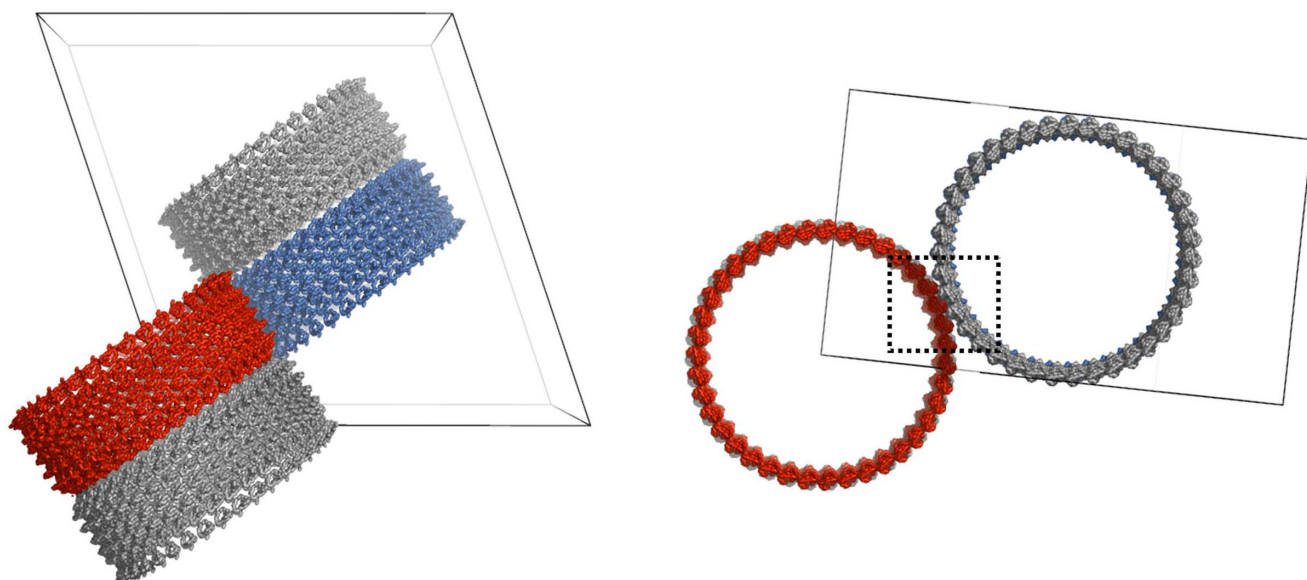

B

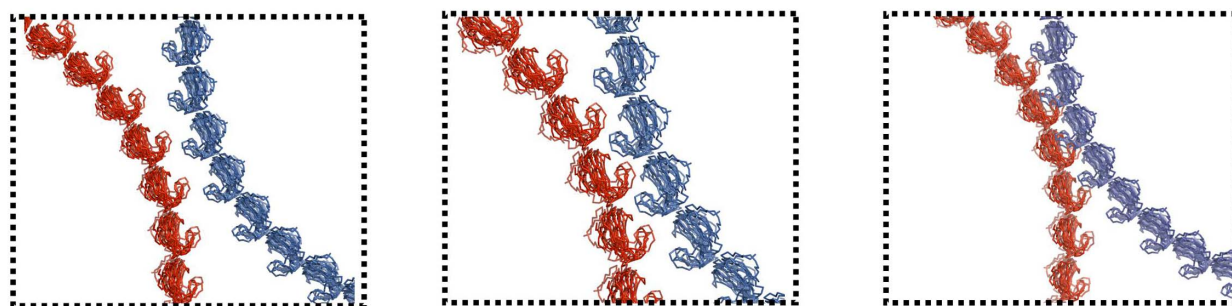

D38

D39

D40

SI: Figure 2

**a**

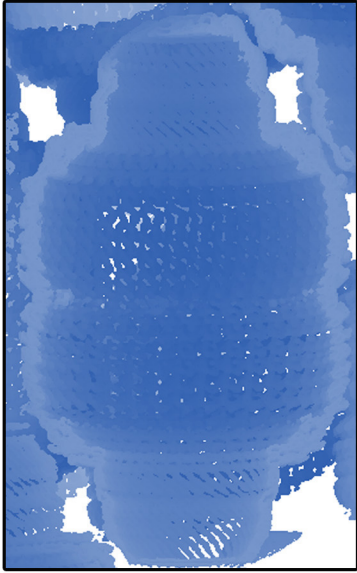

**c**

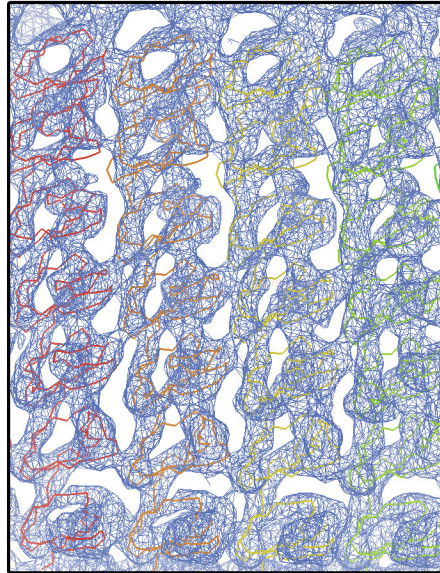

**b**

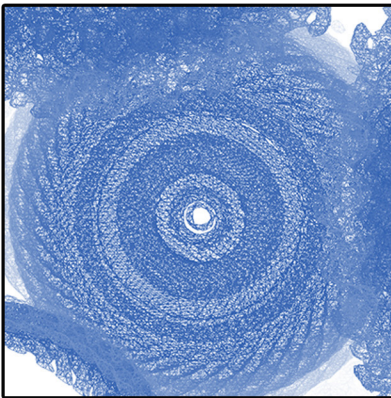

**d**

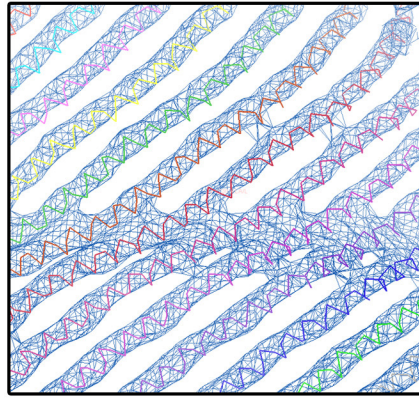

**SI: Figure 3**



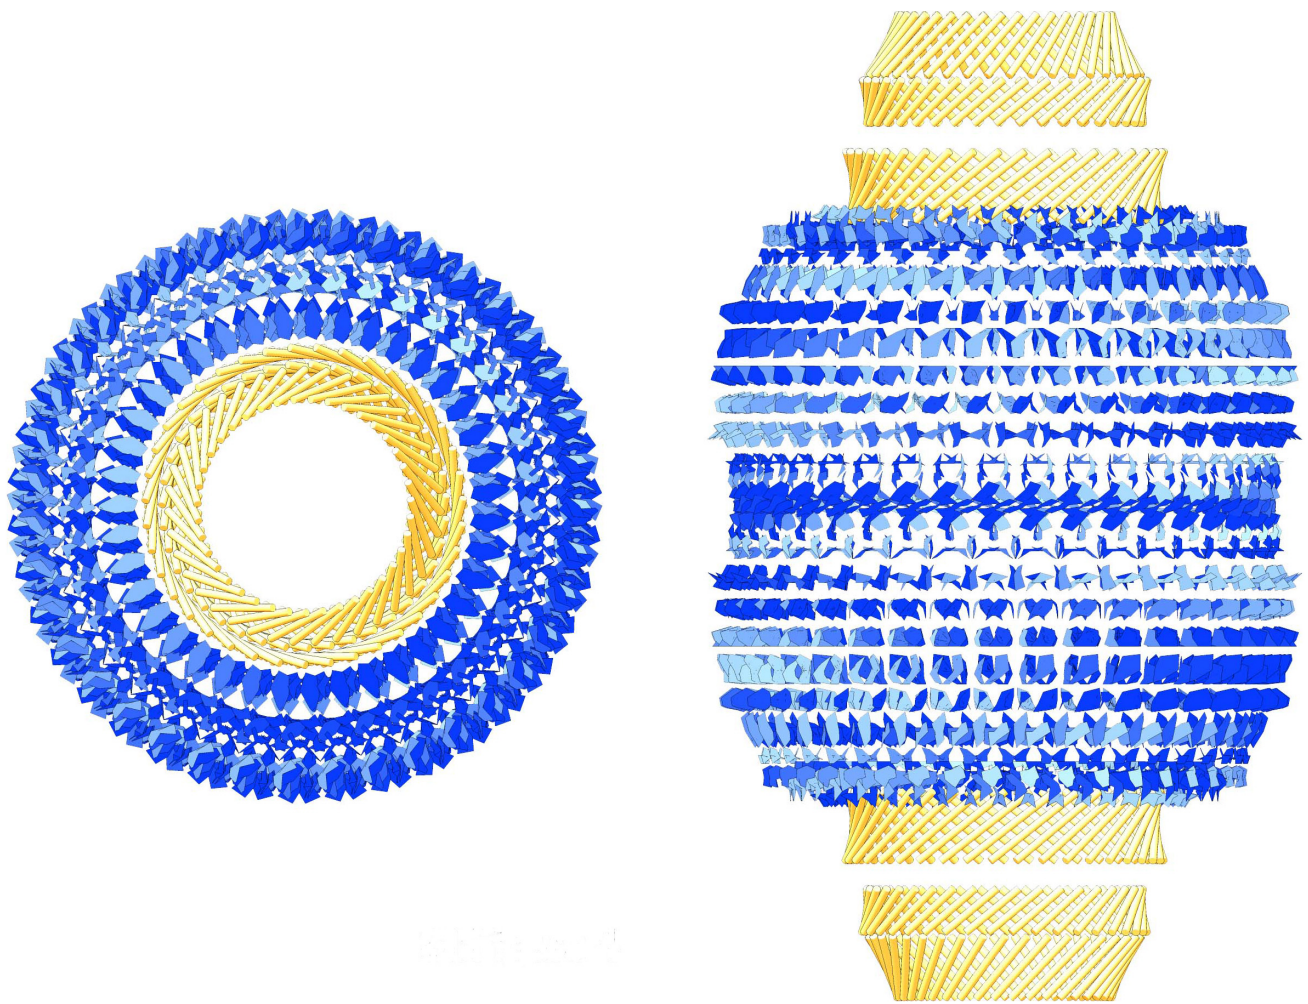

SI: Figure 4

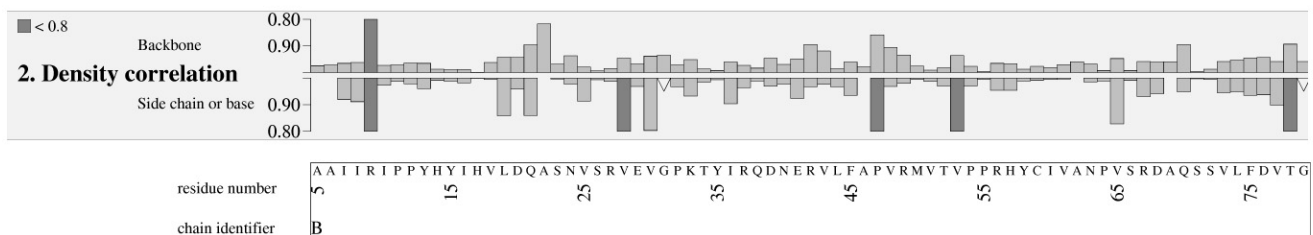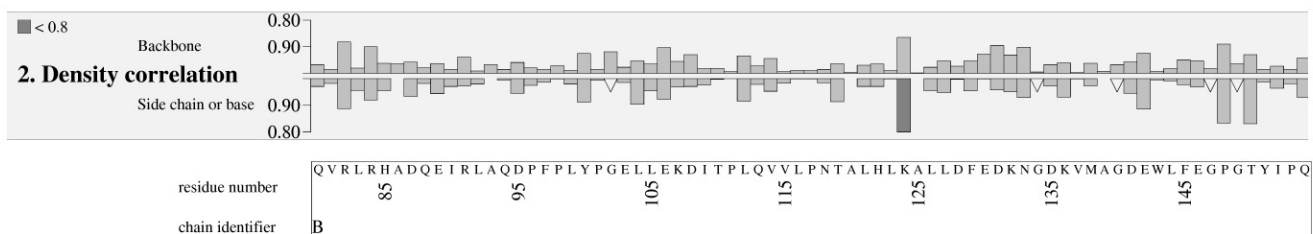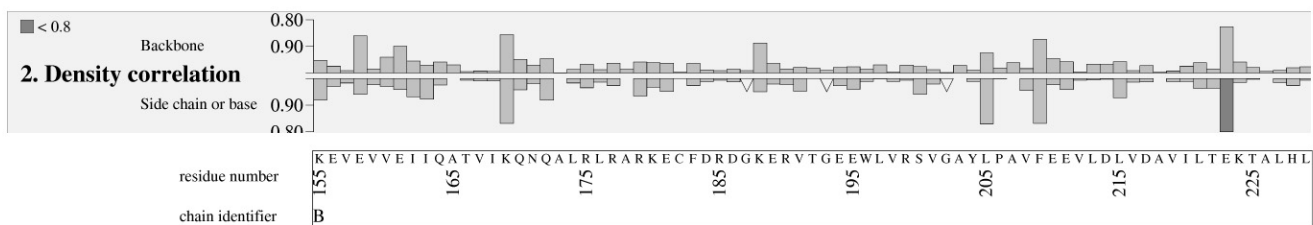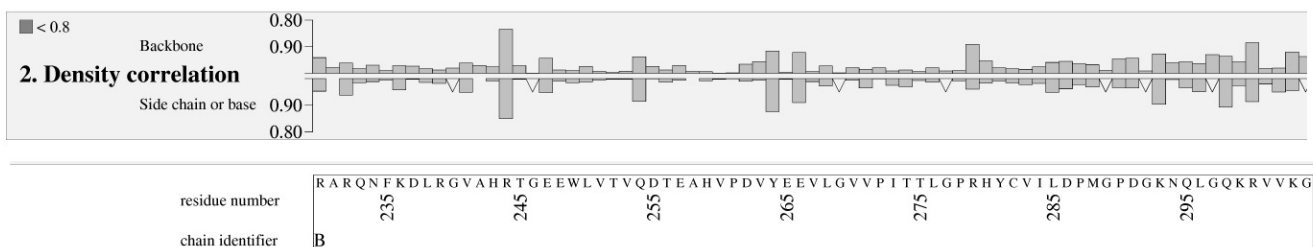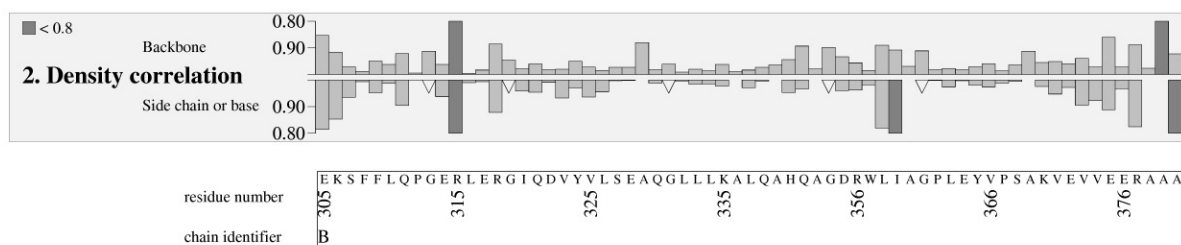

SI:Figure 5A

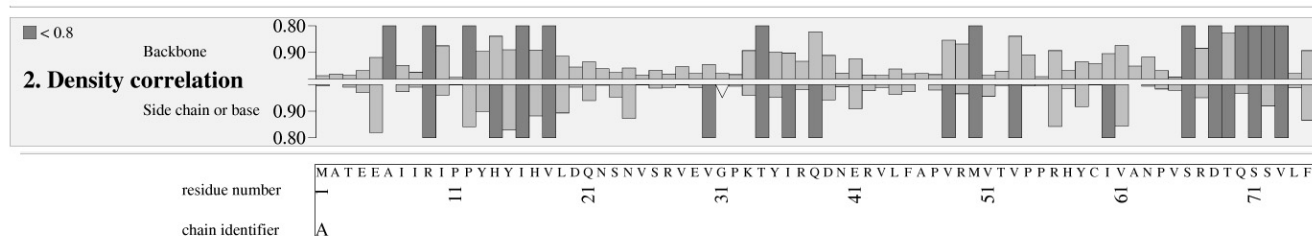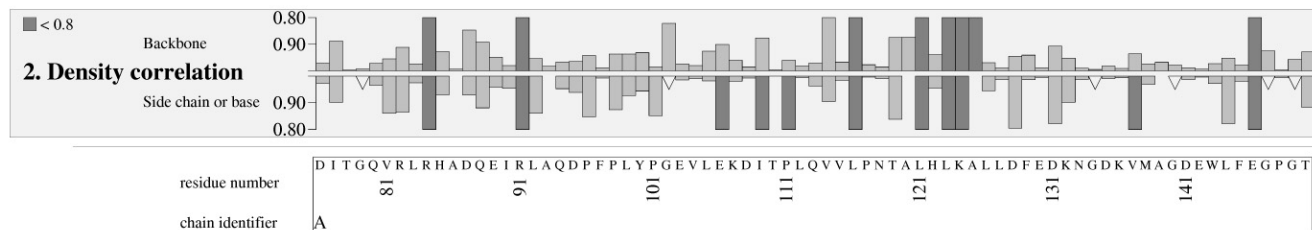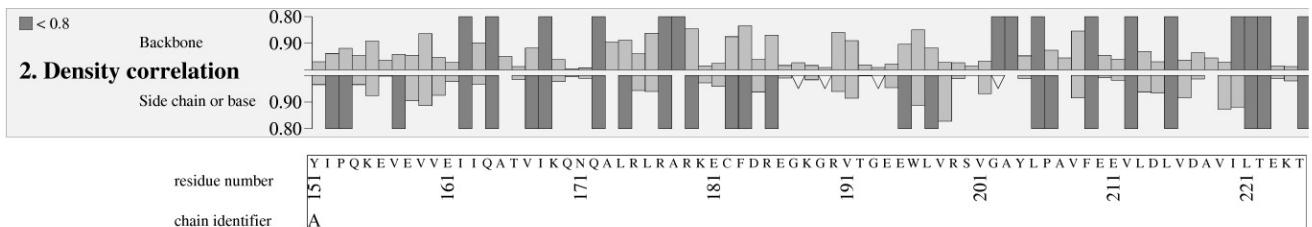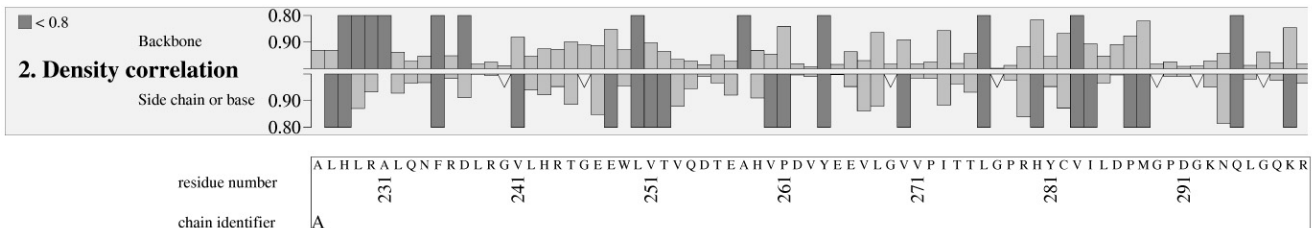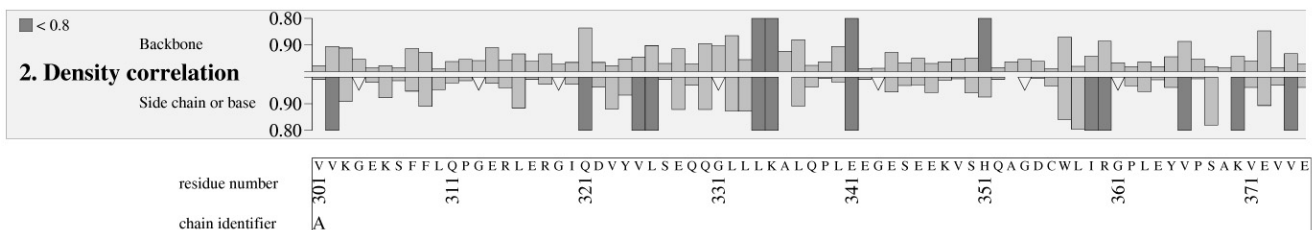

SI:Figure 5B

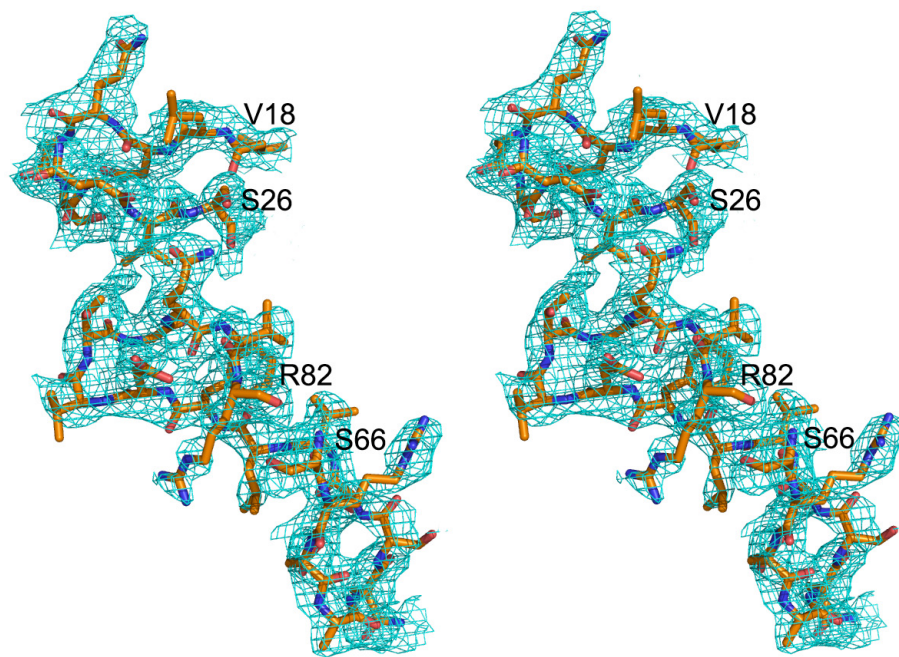

SI:Figure 6

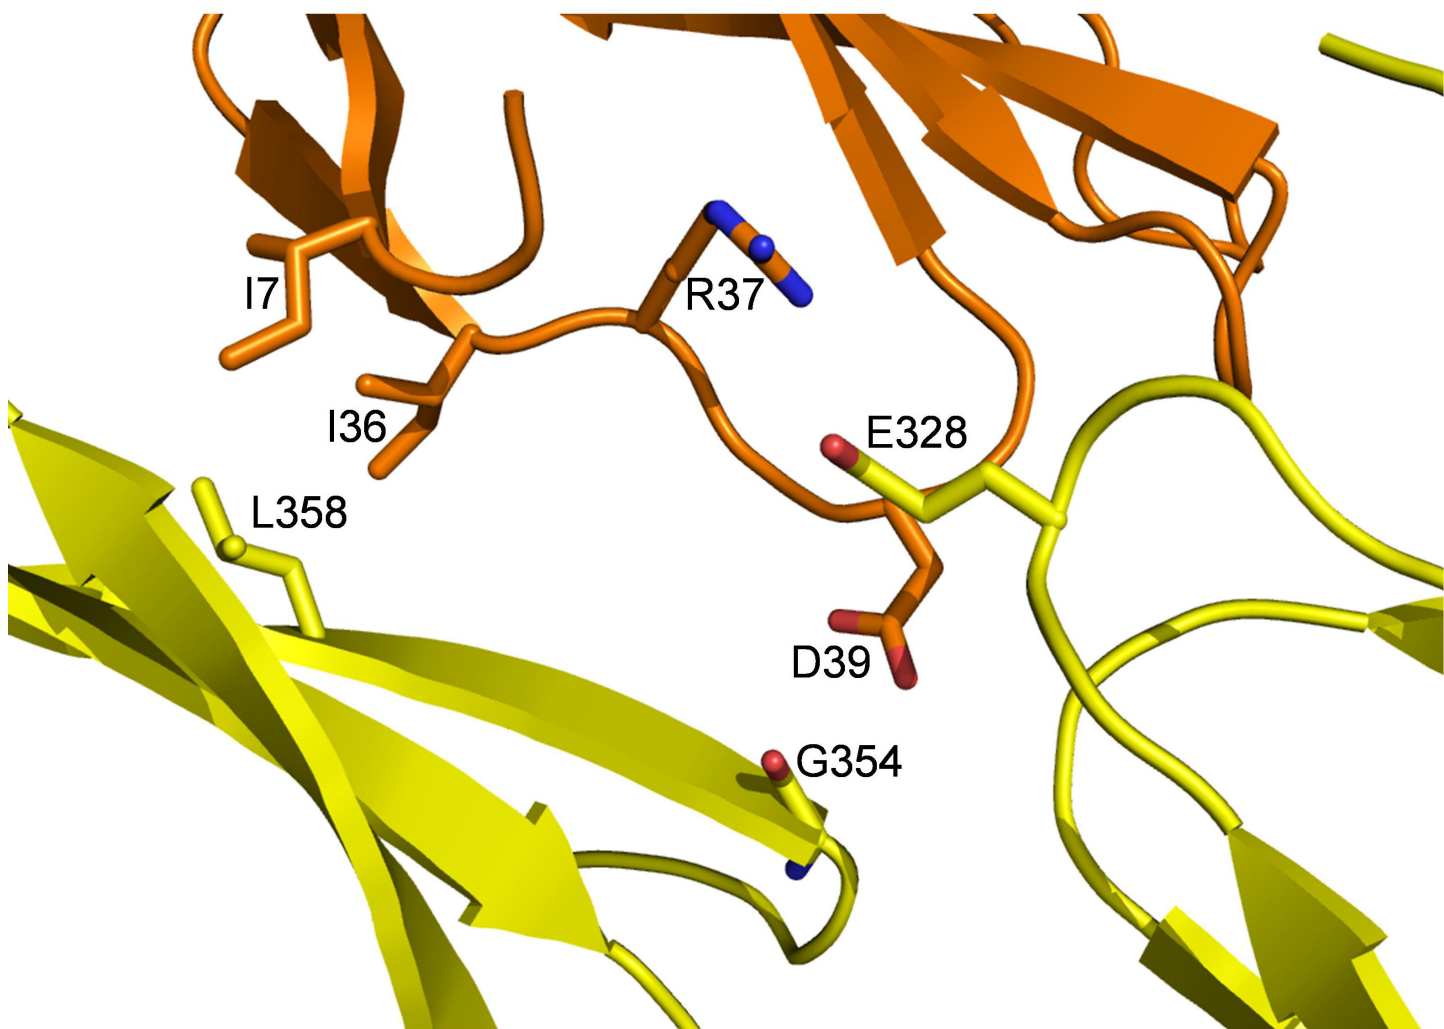

SI:Figure 7

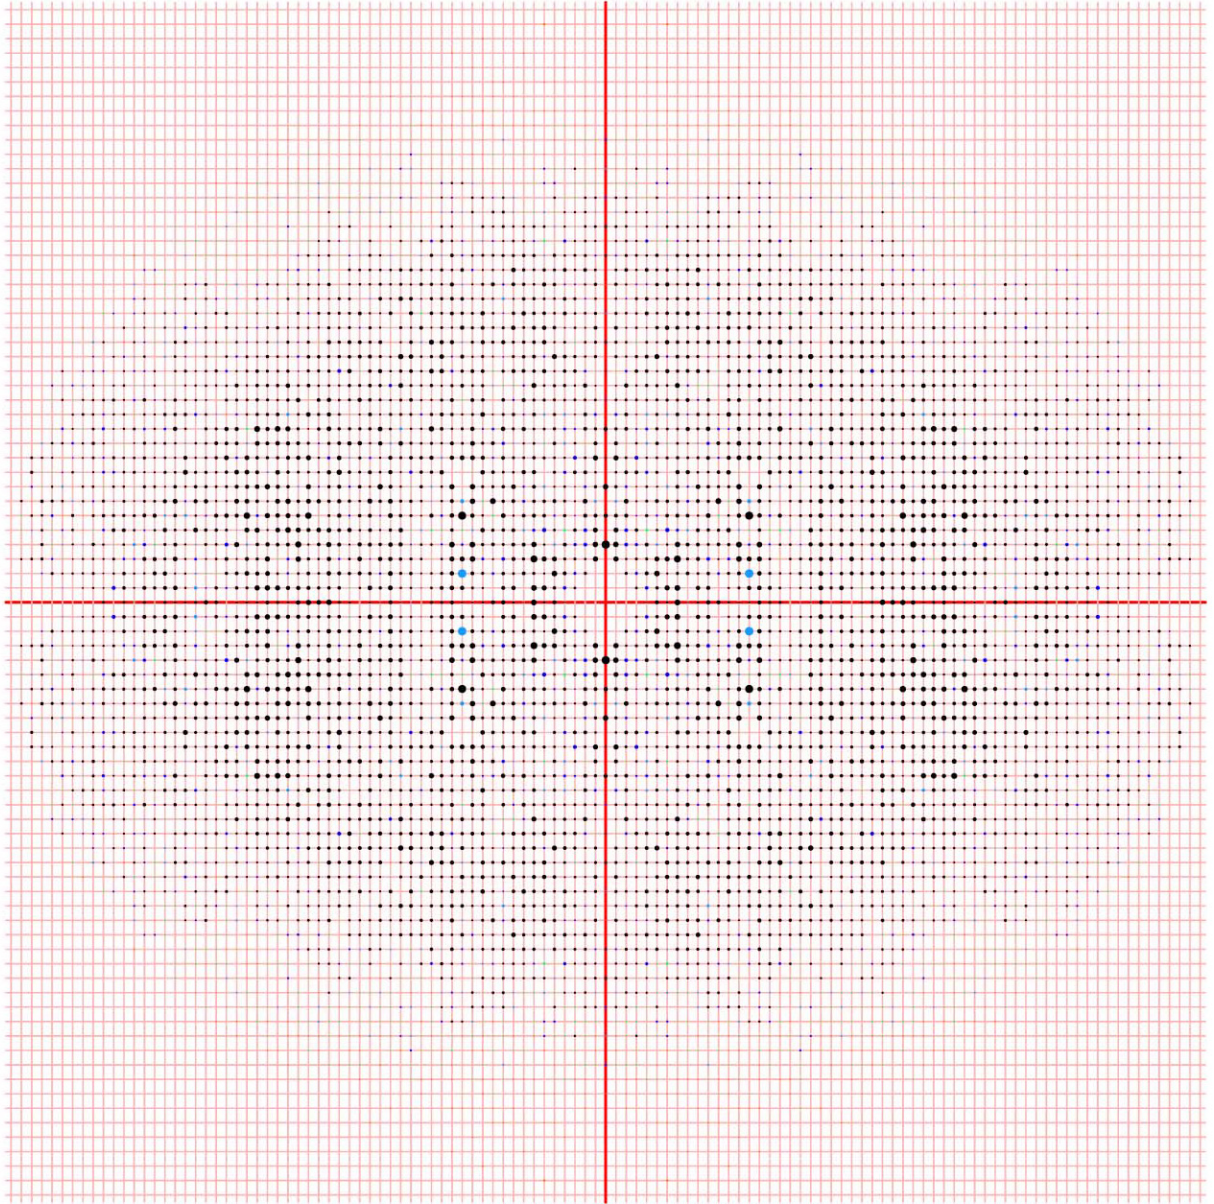

SI:Figure 8

Chi = 180.0

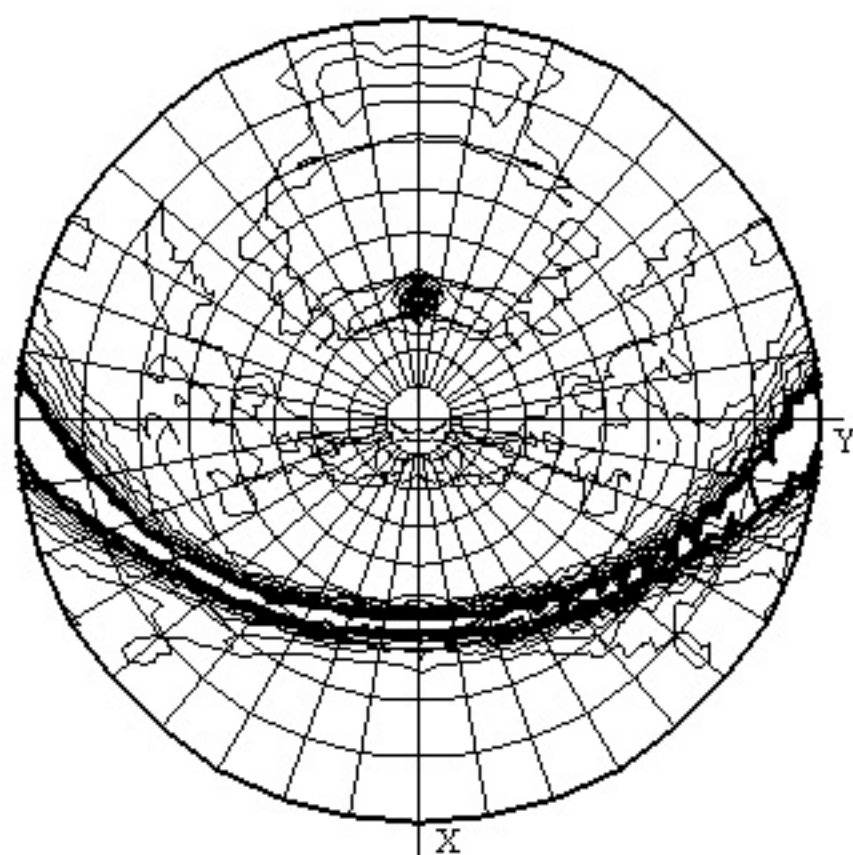

SI: Figure 9

## Supplementary Methods

### X-ray analysis of the vault particle

Two different crystal forms were analysed: first crystals were monoclinic, space group C2, with unit cell parameters  $a_C=726.2\text{\AA}$ ,  $b_C=391.4\text{\AA}$ ,  $c_C=607.6\text{\AA}$  and  $\beta_C=124.1^\circ$ . The second type of crystals were also monoclinic, space group P2<sub>1</sub>, with unit cell parameters  $a_P=601.1\text{\AA}$ ,  $b_P=386.6\text{\AA}$ ,  $c_P=627.1\text{\AA}$  and  $\beta_P=108.6^\circ$

Both, P2<sub>1</sub> and C2, unit cells have similar volumes and their cell axis can be related as:  
 $\vec{a}_C \approx \vec{a}_P + \vec{c}_P$ ;  $\vec{b}_C \approx \vec{b}_P$  and  $\vec{c}_C \approx -\vec{a}_P$ .

The self-rotation functions, calculated at 10 Å resolution with the program MOLREP, showed for both crystal forms the same, very unique, features (Supplementary Figure 9): i) A sharp and strong peak in the a c plane, which remains dominant for essentially all  $\kappa$  values (named henceforth the vaults rotational symmetry peak along the longest vault axis) and ii) A prominent continuous streak, in the  $\kappa=180^\circ$  section, that is located in the plane perpendicular to the strong peak and, consequently, also to the a c plane. The similarities of these characteristic features indicate closely related packing of the vault particles in both crystal forms, even despite the different crystallographic parameters. For the C2 crystals, a half vault particle can be placed in the asymmetric unit with the two halves of a vault related by a crystallographic two fold, as showed in the recently reported structure (Tanaka et al., 2009). For the P2<sub>1</sub> crystals, with a strong peak in the native Patterson function at (0.5, 0.5, 0.5), the asymmetric unit can contain a whole vault particle, with its centre in (0.25, Y, 0.25), that would be related to a second vault particle in the unit cell by the crystal 2<sub>1</sub> symmetry. The translation between the centres of both particles corresponds to the Patterson peak. Therefore, the compact packing of vault particles is almost identical in both crystal forms. In fact, in the P2<sub>1</sub> cell only small deviation from the C2 packing should be expected because reflexions with  $h+k+l$  odd are absent or very weak (pseudo-body centred) till about 15 Å resolution. These observations could explain, at least in part, the easiness of the interconvertibility observed among different crystals forms.



**SI. Table I**  
**R1-R7 Interdomain contacts**

| R1-R2     | R2-R3     | R3-R4     | R4-R5     | R5-R6     | R6-R7     |
|-----------|-----------|-----------|-----------|-----------|-----------|
| Y13-M50   | L112-Q113 | N118-A203 | A173-V260 | I273-T274 | V323-Y324 |
| H14-M50   | -V114     | -L205     | R175-V263 | -S307     | -E364     |
| Y15-P98   | L92-I152  | T119-L205 | R190-Y264 | -F308     | -Y365     |
| H17-P101  | I90-P153  | A120-L205 | E195-V263 | T225-F309 | D322-Y324 |
| -Y100     | Y58-P153  | H122-V208 | W196-V263 | K224-F309 | R279-E364 |
| -L99      | L112-P153 | E142-V208 | L197-D262 | A226-F309 | Y281-P367 |
| N24-Q80   | I90-P153  | I163-L205 | L197-V263 | P272-F309 | V301-P367 |
| V25-G79   | -P154     | N164-L205 | -P261     | T222-F309 |           |
| -Q80      | Q88-K155  | A165-L205 | R199-D262 | V271-L310 |           |
| S26-Q80   | I90-K155  | -A203     | -V260     | L250-L310 |           |
| -P101     | E89-K155  | -Y204     | V216-V260 | -L311     |           |
| R27-P101  | I90-K155  | -V167     | -P261     | -P312     |           |
| V28-Y100  | Q88-K155  | -T166     | D217-V219 | H228-P312 |           |
| -P98      | R84-K155  |           | A218-V219 | W249-P312 |           |
| V48-Met50 |           |           | -V260     |           |           |
| R49-Met50 |           |           | -H259     |           |           |
| -V51      |           |           | -A258     |           |           |
|           |           |           | -I220     |           |           |

**SI. Table II. Data collection statistics of vault crystals**

| <b>Data collection</b> | <b>P2<sub>1</sub></b>                    | <b>C2</b>                          |
|------------------------|------------------------------------------|------------------------------------|
| Wavelength(Å)          | 0.979                                    | 0.979                              |
| Resolution(Å)          | 80-8 (8.5-8.0)                           | 60-10 (10.5-10)                    |
| Space group            | P <sub>21</sub>                          | C2                                 |
| Unit cell(Å)           | a=601.1<br>b=386.6<br>c=627.1<br>β=108.6 | a=726.2 b=391.4<br>c=607.6 β=124.1 |
| Total data             | 925949                                   | 158973                             |
| Unique data            | 158528                                   | 38094                              |
| Mean (<I/σ>)           | 5.6 (1.5)                                | 3.1 (0.8)                          |
| R <sub>merge</sub> %   | 18.2 (38.3)                              | 17.9 (60.3)                        |
| Completeness (%)       | 50.1 (27.7)                              | 48.0 (40.1)                        |

Values in parenthesis are for the highest resolution shell
